# Supplementary material for: Inter-species Metabolic Interactions in an In-vitro Minimal Human Gut Microbiome of Core Bacteria
Source: PubMed Central journal article supplement (PMC8993927; doi:10.1038/s41522-022-00275-2), 2022-04-08
Supplement: 41522_2022_275_MOESM1_ESM.pdf [file 41522_2022_275_MOESM1_ESM.pdf]

# Inter-species Metabolic Interactions in a an *In-vitro* Minimal Human Gut Microbiome of Core Bacteria

Sudarshan A. Shetty<sup>1,#</sup>, Ben Kuipers<sup>1</sup>, Siavash Atashgahi<sup>1,2</sup>, Steven Aalvink<sup>1</sup>, Hauke Smidt<sup>1</sup>, Willem M. de Vos<sup>1,3\*</sup>

<sup>1</sup>Laboratory of Microbiology, Wageningen University & Research, Wageningen, The Netherlands.

<sup>2</sup>Department of Microbiology, Radboud University, Nijmegen, The Netherlands.

<sup>3</sup>Human Microbiome Research Program, Faculty of Medicine, University of Helsinki, Helsinki, Finland.

#Present address: Department of Medical Microbiology and Infection prevention, Virology and Immunology Research Group, University Medical Center Groningen, Groningen, Netherlands.

**Running title:** Function and interactions in a minimal gut microbiome

Corresponding author: Willem M. de Vos; willem.devos@wur.nl

## Supplementary Tables

**Supplementary Table S1: Carbon sources used for growing pre-cultures of individual strains of DB-MM.**

| Sr. No. | Bacterial strain                                                            | Carbon sources (mM)                                |
|---------|-----------------------------------------------------------------------------|----------------------------------------------------|
| 1       | <i>Agathobacter rectalis</i> (DSM 17629)                                    | Glucose (20 mM); lactose (20 mM); xylose (20 mM)   |
| 2       | <i>Bacteroides ovatus</i> 3_8_47FAA                                         | Glucose (20 mM); Galactose (20 mM); xylose (20 mM) |
| 3       | <i>Bacteroides</i> sp 2_1_22                                                | Glucose (20 mM); Galactose (20 mM); xylose (20 mM) |
| 4       | <i>Coprococcus catus</i> ATCC® 27761™                                       | Glucose (60 mM)                                    |
| 5       | <i>Anaerobutyricum</i> [Eubacterium] <i>soehngeni</i> (DSM 17630)           | Glucose (60 mM)                                    |
| 6       | <i>Eubacterium siraeum</i> (DSM 15702)                                      | Glucose (30 mM); (maltose 20 mM)                   |
| 7       | <i>Faecalibacterium prausnitzii</i> (A2-165)                                | Glucose (30 mM); fructose (30 mM)                  |
| 8       | Lachnospiraceae bacterium 7_1_58FAA (closely related to <i>F. plautii</i> ) | Glucose (20 mM); fructose (20 mM)                  |
| 9       | <i>Roseburia intestinalis</i> (DSM 14610)                                   | Glucose (30 mM); maltose (20 mM)                   |
| 10      | <i>Subdoligranulum variabile</i> (DSM 15176)                                | Glucose (60 mM)                                    |

**Supplementary Table S2: Occupancy and metabolic features of the selected bacterial strains.** \*Weak growth reported previously. <sup>β</sup>barnap predicted single short nucleotide sequence of 16S rRNA gene. <sup>§</sup>Information based on representative strains for each of the species. <sup>#</sup>The 16S rRNA gene copy numbers were calculated using the genome sequences.

| Sr. No. | Bacterial strain                    | Strain used (16S rRNA gene copy number <sup>#</sup> )               | Occupancy (%) | Carbon source breakdown/utilization <sup>§</sup> , (reference)               | NCBI Genome Accession    |
|---------|-------------------------------------|---------------------------------------------------------------------|---------------|------------------------------------------------------------------------------|--------------------------|
| 1       | <i>Eubacterium rectale</i>          | <i>Agathobacter</i> [Eubacterium] <i>rectalis</i> DSM 17629 (5)     | 97.4          | Starch, cellobiose, inulin<br>Butyrate and lactate production <sup>1,2</sup> | CP001107.1               |
| 2       | <i>Bacteroides ovatus</i>           | <i>Bacteroides ovatus</i> 3_8_47FAA (2)                             | 92.4          | Starch, xylan, inulin<br>Acetate and propionate production <sup>3</sup>      | GL945018.1               |
| 3       | <i>Bacteroides xylanisolvens</i>    | <i>Bacteroides</i> sp 2_1_22 (1)                                    | 76.1          | Xylan, cellobiose <sup>4</sup>                                               | GCF_000162155.1          |
| 4       | <i>Coprococcus catus</i>            | <i>Coprococcus catus</i> ATCC® 27761™ (1)                           | 83.5          | Lactate <sup>5</sup> , fructose, glucose <sup>6</sup>                        | GCF_019734885.1          |
| 5       | <i>Eubacterium hallii</i>           | <i>Anaerobutyricum</i> [Eubacterium] <i>soehngeni</i> DSM 17630 (8) | 92.3          | Glucose, lactate plus acetate <sup>7</sup>                                   | LT907978.1               |
| 6       | <i>Eubacterium siraeum</i>          | <i>Eubacterium siraeum</i> DSM 15702 (1) <sup>β</sup>               | 70.5          | Starch*, xylan <sup>8</sup> , fructose, cellobiose <sup>9</sup>              | KB907512<br>ARNC01000000 |
| 7       | <i>Faecalibacterium prausnitzii</i> | <i>Faecalibacterium prausnitzii</i> A2-165 (2)                      | 99.2          | Starch, inulin, pectin <sup>10 11</sup>                                      | GG697168.2               |
| 8       | Lachnospiraceae bacterium 7_1_58FAA | Lachnospiraceae bacterium 7_1_58FAA (1)                             | 90.2          | Glucose, fructose                                                            | GCF_000242155.1          |
| 9       | <i>Roseburia intestinalis</i>       | <i>Roseburia intestinalis</i> DSM 14610 (3)                         | 76.4          | Starch, cellobiose*, fructose, xylan <sup>12</sup>                           | GCF_000156535.1          |
| 10      | <i>Subdoligranulum unclassified</i> | <i>Subdoligranulum variabile</i> DSM 15176 (4)                      | 99.8          | Cellobiose, glucose <sup>13</sup>                                            | GCF_000157955.1          |

**Supplementary Table S3: Information regarding RNA-sequencing output.** The total reads mapped to Db-MM refers to reads mapped after trimming, merging of paired-end reads and removal of rRNA reads.

| Sample | Raw Reads | Clean Reads | Q20(%) | Q30(%) | GC Content (%) | Total reads mapped to Db-MM |
|--------|-----------|-------------|--------|--------|----------------|-----------------------------|
| B1T24  | 21796587  | 21400642    | 97.53  | 93.1   | 48.07          | 6841829                     |
| B2T24  | 23175032  | 22790250    | 97.56  | 93.06  | 47.14          | 8976800                     |
| B3T24  | 23539598  | 23165216    | 97.66  | 93.32  | 48.06          | 11104424                    |
| B1T48  | 20681656  | 20249822    | 97.59  | 93.24  | 51             | 10431307                    |
| B2T48  | 20401433  | 20090092    | 97.45  | 92.86  | 49.59          | 10489383                    |
| B3T48  | 22308228  | 21900920    | 97.55  | 93.12  | 49.77          | 12495581                    |

**Supplementary Table S4: Average nucleotide identity values comparing unclassified Db-MM strains with respective species type strains.** We used the EzTaxon webserver's Average Nucleotide Identity (ANI) calculator tool <sup>14,15</sup>.

| Comparison                                                          | NCBI Genome Accession Reference vs Strain Genome | OrthoANIu value (%) |
|---------------------------------------------------------------------|--------------------------------------------------|---------------------|
| <i>Flavonifractor plautii</i> - Lachnospiraceae bacterium 7_1_58FAA | NZ_CP048436.1 - GCF_000242155.1                  | 98.15               |
| <i>Bacteroides ovatus</i> - <i>Bacteroides ovatus</i> 3_8_47FAA     | NZ_CP012938.1 - GL945018.1                       | 96.75               |
| <i>B. xylanisolvans</i> - <i>Bacteroides sp 2_1_22</i>              | ASM1566878v1 - GCF_000162155.1                   | 97.46               |

**Supplementary Table S5: Enzymatic quantification of D and L- Lactate.**

| Sample | D-Lactate (mM) | L-Lactate (mM) |
|--------|----------------|----------------|
| B1T24  | 0.69 ± 0.15    | 4.35 ± 0.24    |
| B2T24  | 1.10 ± 0.03    | 5.10 ± 0.05    |
| B3T24  | 3.41 ± 0.27    | 5.34 ± 0.28    |

**Supplementary Table S6: Raw counts of Db-MM strains in metatranscriptomes of triplicate sample from 24 hr and 48 hr time points.**

| Db-MM species                       | 24 hr   |         |         | 48 hr   |         |         |
|-------------------------------------|---------|---------|---------|---------|---------|---------|
|                                     | B1T24   | B2T24   | B3T24   | B1T48   | B2T48   | B3T48   |
| <i>Agathobacter rectalis</i>        | 1189883 | 1533353 | 1994131 | 680440  | 1288745 | 1758023 |
| <i>Anaerobutyricum soehngenii</i>   | 253483  | 385919  | 100388  | 153621  | 188132  | 462404  |
| <i>Bacteroides ovatus</i>           | 396928  | 612919  | 1564701 | 664898  | 778758  | 1144162 |
| <i>Bacteroides xylanisolvans</i>    | 415784  | 718469  | 1352381 | 627481  | 1064527 | 1337283 |
| <i>Coprococcus catus</i>            | 268453  | 256730  | 97931   | 255466  | 210763  | 806083  |
| <i>Eubacterium siraeum</i>          | 1705679 | 2685626 | 562719  | 1248773 | 1228419 | 738649  |
| <i>Faecalibacterium prausnitzii</i> | 1472613 | 1517503 | 3945749 | 4804605 | 3807111 | 3908967 |
| <i>Flavonifractor plautii</i>       | 342532  | 359223  | 404157  | 1154960 | 994472  | 948667  |
| <i>Roseburia intestinalis</i>       | 654577  | 755884  | 684482  | 259317  | 350652  | 349584  |
| <i>Subdoligranulum variabile</i>    | 141897  | 151174  | 397785  | 581746  | 577804  | 1041759 |

**Supplementary Table S7: Differential expression analysis of total transcript abundance mapped to individual bacteria strains in metatranscriptomics.** The transcripts per million counts for each strain in the metatranscriptomic data were compared between 24 h and 48 h based on Wald test using DESeq2 package <sup>16</sup>. Significant values are highlighted as grey coloured cells.

| Bacteria                            | baseMean   | FoldChange (log2) | lfcSE | Wald test p-value | Benjamini-Hochberg (BH) padj |
|-------------------------------------|------------|-------------------|-------|-------------------|------------------------------|
| <i>Faecalibacterium prausnitzii</i> | 3107078.28 | 0.72              | 0.42  | 0.0867890         | 0.1735780                    |
| <i>Eubacterium siraeum</i>          | 1478596.15 | -0.92             | 0.67  | 0.1696240         | 0.2827070                    |
| <i>Agathobacter rectalis</i>        | 1368737.08 | -0.66             | 0.31  | 0.0307960         | 0.0769910                    |
| <i>Bacteroides xylanisolvens</i>    | 855146.84  | 0.06              | 0.32  | 0.8395630         | 0.8395630                    |
| <i>Subdoligranulum variabile</i>    | 799716.82  | -0.18             | 0.34  | 0.6038490         | 0.6709430                    |
| <i>Bacteroides ovatus</i>           | 680889.19  | 1.24              | 0.31  | 0.0000824         | 0.0002750                    |
| <i>Flavonifractor plautii</i>       | 530992.53  | -1.43             | 0.27  | 0.0000002         | 0.0000017                    |
| <i>Roseburia intestinalis</i>       | 432720.22  | 1.44              | 0.31  | 0.0000042         | 0.0000212                    |
| <i>Coprococcus catus</i>            | 293997.97  | 0.46              | 0.59  | 0.4354750         | 0.6221070                    |
| <i>Anaerobutyricum soehngenii</i>   | 253901.51  | -0.39             | 0.68  | 0.5676990         | 0.6709430                    |

\* lfcSE: standard error of the log2FoldChange

**Supplementary Table S8: Community level fold changes in KO abundance in metatranscriptomics between 24 h and 48 h.** The KEGG KOs that were identified by gene set enrichment analysis in supplementary figure S2.

| Sr. No. | KO ID  | Fold change | Gene Name                                                                                                 |
|---------|--------|-------------|-----------------------------------------------------------------------------------------------------------|
| 1       | K00024 | -2.94096    | mdh; malate dehydrogenase [EC:1.1.1.37]                                                                   |
| 2       | K00033 | -2.89569    | PGD, gnd, gntZ; 6-phosphogluconate dehydrogenase [EC:1.1.1.44 1.1.1.343]                                  |
| 3       | K00036 | -2.17893    | G6PD, zwf; glucose-6-phosphate 1-dehydrogenase [EC:1.1.1.49 1.1.1.363]                                    |
| 4       | K00053 | -1.66609    | ilvC; ketol-acid reductoisomerase [EC:1.1.1.86]                                                           |
| 5       | K00128 | 1.523144    | ALDH; aldehyde dehydrogenase (NAD+) [EC:1.2.1.3]                                                          |
| 6       | K00170 | 2.492078    | porB; pyruvate ferredoxin oxidoreductase beta subunit [EC:1.2.7.1]                                        |
| 7       | K00171 | 3.300088    | porD; pyruvate ferredoxin oxidoreductase delta subunit [EC:1.2.7.1]                                       |
| 8       | K00174 | -1.50009    | korA, oorA, oforA; 2-oxoglutarate/2-oxoacid ferredoxin oxidoreductase subunit alpha [EC:1.2.7.3 1.2.7.11] |
| 9       | K00175 | -1.57553    | korB, oorB, oforB; 2-oxoglutarate/2-oxoacid ferredoxin oxidoreductase subunit beta [EC:1.2.7.3 1.2.7.11]  |
| 10      | K00177 | -1.63584    | korC, oorC; 2-oxoglutarate ferredoxin oxidoreductase subunit gamma [EC:1.2.7.3]                           |
| 11      | K00198 | 1.54816     | cooS, acsA; anaerobic carbon-monoxide dehydrogenase catalytic subunit [EC:1.2.7.4]                        |
| 12      | K00226 | -2.12646    | pyrD; dihydroorotate dehydrogenase (fumarate) [EC:1.3.98.1]                                               |
| 13      | K00239 | -2.08143    | sdhA, frdA; succinate dehydrogenase / fumarate reductase, flavoprotein subunit [EC:1.3.5.1 1.3.5.4]       |
| 14      | K00240 | -1.99028    | sdhB, frdB; succinate dehydrogenase / fumarate reductase, iron-sulfur subunit [EC:1.3.5.1 1.3.5.4]        |
| 15      | K00241 | -2.79632    | sdhC, frdC; succinate dehydrogenase / fumarate reductase, cytochrome b subunit                            |
| 16      | K00425 | -2.8396     | cydA; cytochrome bd ubiquinol oxidase subunit I [EC:7.1.1.7]                                              |
| 17      | K00426 | -2.30804    | cydB; cytochrome bd ubiquinol oxidase subunit II [EC:7.1.1.7]                                             |
| 18      | K00605 | -2.01977    | gevT, AMT; aminomethyltransferase [EC:2.1.2.10]                                                           |
| 19      | K00627 | 1.905094    | DLAT, aceF, pdhC; pyruvate dehydrogenase E2 component (dihydrolipoamide acetyltransferase) [EC:2.3.1.12]  |
| 20      | K00632 | 1.97916     | fadA, fadI; acetyl-CoA acyltransferase [EC:2.3.1.16]                                                      |
| 21      | K00895 | -1.73544    | pfp, PFP; diphosphate-dependent phosphofructokinase [EC:2.7.1.90]                                         |
| 22      | K00940 | -2.85147    | ndk, NME; nucleoside-diphosphate kinase [EC:2.7.4.6]                                                      |

|    |        |          |                                                                                                                                                     |
|----|--------|----------|-----------------------------------------------------------------------------------------------------------------------------------------------------|
| 23 | K00954 | -1.71944 | E2.7.7.3A, coaD, kdtB; pantetheine-phosphate adenylyltransferase [EC:2.7.7.3]                                                                       |
| 24 | K01007 | 1.694605 | pps, ppsA; pyruvate, water dikinase [EC:2.7.9.2]                                                                                                    |
| 25 | K01029 | 2.235891 | E2.8.3.5B, scoB; 3-oxoacid CoA-transferase subunit B [EC:2.8.3.5]                                                                                   |
| 26 | K01057 | -1.89191 | PGLS, pgl, devB; 6-phosphogluconolactonase [EC:3.1.1.31]                                                                                            |
| 27 | K01176 | -2.40483 | AMY, amyA, malS; alpha-amylase [EC:3.2.1.1]                                                                                                         |
| 28 | K01193 | 3.750748 | INV, sacA; beta-fructofuranosidase [EC:3.2.1.26]                                                                                                    |
| 29 | K01200 | -1.80797 | pulA; pullulanase [EC:3.2.1.41]                                                                                                                     |
| 30 | K01596 | -2.50671 | E4.1.1.32, pckA, PCK; phosphoenolpyruvate carboxykinase (GTP) [EC:4.1.1.32]                                                                         |
| 31 | K01676 | -1.75216 | E4.2.1.2A, fumA, fumB; fumarate hydratase, class I [EC:4.2.1.2]                                                                                     |
| 32 | K01838 | -2.47437 | pgmB; beta-phosphoglucomutase [EC:5.4.2.6]                                                                                                          |
| 33 | K01847 | -1.66061 | MUT; methylmalonyl-CoA mutase [EC:5.4.99.2]                                                                                                         |
| 34 | K01848 | 2.859385 | E5.4.99.2A, mcmA1; methylmalonyl-CoA mutase, N-terminal domain [EC:5.4.99.2]                                                                        |
| 35 | K01849 | 2.476116 | E5.4.99.2B, mcmA2; methylmalonyl-CoA mutase, C-terminal domain [EC:5.4.99.2]                                                                        |
| 36 | K01902 | -1.54862 | sucD; succinyl-CoA synthetase alpha subunit [EC:6.2.1.5]                                                                                            |
| 37 | K01960 | -2.31476 | pycB; pyruvate carboxylase subunit B [EC:6.4.1.1]                                                                                                   |
| 38 | K02106 | 1.96424  | atoE; short-chain fatty acids transporter                                                                                                           |
| 39 | K02387 | -1.55908 | flgB; flagellar basal-body rod protein FlgB                                                                                                         |
| 40 | K02388 | -1.70273 | flgC; flagellar basal-body rod protein FlgC                                                                                                         |
| 41 | K02390 | -1.50895 | flgE; flagellar hook protein FlgE                                                                                                                   |
| 42 | K02406 | -2.69061 | fliC; flagellin                                                                                                                                     |
| 43 | K02407 | -2.07865 | fliD; flagellar hook-associated protein 2                                                                                                           |
| 44 | K02408 | -1.56432 | fliE; flagellar hook-basal body complex protein FliE                                                                                                |
| 45 | K02414 | -2.38734 | fliK; flagellar hook-length control protein FliK                                                                                                    |
| 46 | K02422 | -2.16507 | fliS; flagellar protein FliS                                                                                                                        |
| 47 | K02437 | -1.98741 | gcvH, GCSH; glycine cleavage system H protein                                                                                                       |
| 48 | K02650 | -2.79189 | pilA; type IV pilus assembly protein PilA                                                                                                           |
| 49 | K03389 | 1.795722 | hdrB2; heterodisulfide reductase subunit B2 [EC:1.8.7.3 1.8.98.4 1.8.98.5 1.8.98.6]                                                                 |
| 50 | K03407 | -1.67972 | cheA; two-component system, chemotaxis family, sensor kinase CheA [EC:2.7.13.3]                                                                     |
| 51 | K03408 | -1.69399 | cheW; purine-binding chemotaxis protein CheW                                                                                                        |
| 52 | K03412 | -1.58349 | cheB; two-component system, chemotaxis family, protein-glutamate methylesterase/glutaminase [EC:3.1.1.61 3.5.1.44]                                  |
| 53 | K03415 | -1.72794 | cheV; two-component system, chemotaxis family, chemotaxis protein CheV                                                                              |
| 54 | K03781 | -2.32585 | katE, CAT, catB, srpA; catalase [EC:1.11.1.6]                                                                                                       |
| 55 | K05341 | 4.106092 | E2.4.1.4; amylosucrase [EC:2.4.1.4]                                                                                                                 |
| 56 | K06016 | 1.972509 | pydC; beta-ureidopropionase / N-carbamoyl-L-amino-acid hydrolase [EC:3.5.1.6 3.5.1.87]                                                              |
| 57 | K06896 | 1.500823 | mapP; maltose 6'-phosphate phosphatase [EC:3.1.3.90]                                                                                                |
| 58 | K07250 | 1.990253 | gabT; 4-aminobutyrate aminotransferase / (S)-3-amino-2-methylpropionate transaminase / 5-aminovalerate transaminase [EC:2.6.1.19 2.6.1.22 2.6.1.48] |
| 59 | K07405 | -1.92605 | E3.2.1.1A; alpha-amylase [EC:3.2.1.1]                                                                                                               |
| 60 | K07652 | 1.897802 | vicK; two-component system, OmpR family, sensor histidine kinase VicK [EC:2.7.13.3]                                                                 |
| 61 | K07668 | 1.571842 | vicR; two-component system, OmpR family, response regulator VicR                                                                                    |
| 62 | K07777 | -2.06544 | degS; two-component system, NarL family, sensor histidine kinase DegS [EC:2.7.13.3]                                                                 |
| 63 | K08722 | 1.750147 | yfbR; 5'-deoxynucleotidase [EC:3.1.3.89]                                                                                                            |
| 64 | K10540 | -1.79591 | mglB; methyl-galactoside transport system substrate-binding protein                                                                                 |
| 65 | K10914 | 4.889803 | crp; CRP/FNR family transcriptional regulator, cyclic AMP receptor protein                                                                          |
| 66 | K11261 | 1.754817 | fwdE, fmdE; formylmethanofuran dehydrogenase subunit E [EC:1.2.7.12]                                                                                |
| 67 | K11645 | -1.86848 | fbaB; fructose-bisphosphate aldolase, class I [EC:4.1.2.13]                                                                                         |

|    |        |          |                                                                                |
|----|--------|----------|--------------------------------------------------------------------------------|
| 68 | K17722 | 5.06483  | preT; dihydropyrimidine dehydrogenase (NAD+) subunit PreT [EC:1.3.1.1]         |
| 69 | K17723 | 1.884507 | preA; dihydropyrimidine dehydrogenase (NAD+) subunit PreA [EC:1.3.1.1]         |
| 70 | K18118 | 2.62769  | aarC, cat1; succinyl-CoA:acetate CoA-transferase [EC:2.8.3.18]                 |
| 71 | K18344 | 1.579435 | vanRB, vanR, vanRD; two-component system, OmpR family, response regulator VanR |
| 72 | K18348 | 2.592029 | vanT; serine/alanine racemase [EC:5.1.1.18 5.1.1.1]                            |
| 73 | K18856 | 2.704648 | vanC, vanE, vanG; D-alanine---D-serine ligase [EC:6.3.2.35]                    |
| 74 | K18866 | 2.642704 | vanXY; zinc D-Ala-D-Ala dipeptidase/carboxypeptidase [EC:3.4.13.22 3.4.17.14]  |
| 75 | K20489 | 2.340271 | nisI; lantibiotic immunity protein                                             |
| 76 | K22373 | -2.31388 | larA; lactate racemase [EC:5.1.2.1]                                            |
| 77 | K23259 | -2.14437 | adh; isopropanol dehydrogenase (NADP+) [EC:1.1.1.80]                           |

## Supplementary Figures

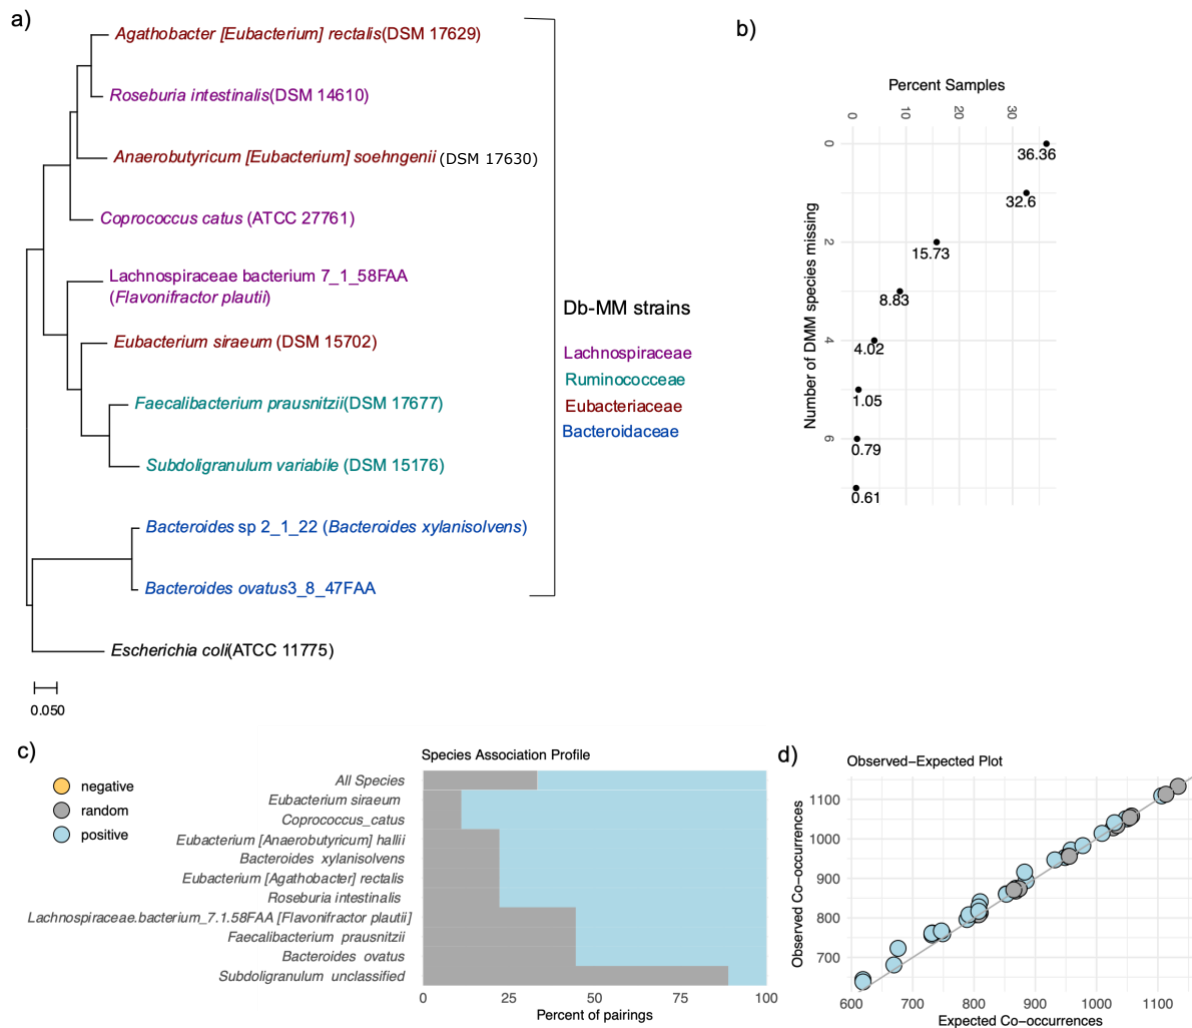

**Supplementary Figure S1: Phylogeny and co-occurrences of Db-MM strains in human gut metagenomes.** a) 16S rRNA gene based phylogenetic relationship inferred using the Maximum Likelihood method and Kimura 2-parameter model. The analysis was done using MEGA11<sup>17,18</sup>. *E. coli* is used as outgroup for building the tree and is not part of the Db-MM. The taxonomic affiliation for DB-MM strains is based on curated metagenomic DB data that we used in our study. b) Percent of samples out of 1144 human gut metagenomes in which Db-MM species are observed. We observed the 36 % of samples consisted all ten Db-MM species. c) Co-occurrence profiles for Db-MM species in 1144 human gut metagenomes determined using the probabilistic co-occurrence model. d) Expected co-occurrence profiles for Db-MM species in 1144 human gut metagenomes compared with the null-model.

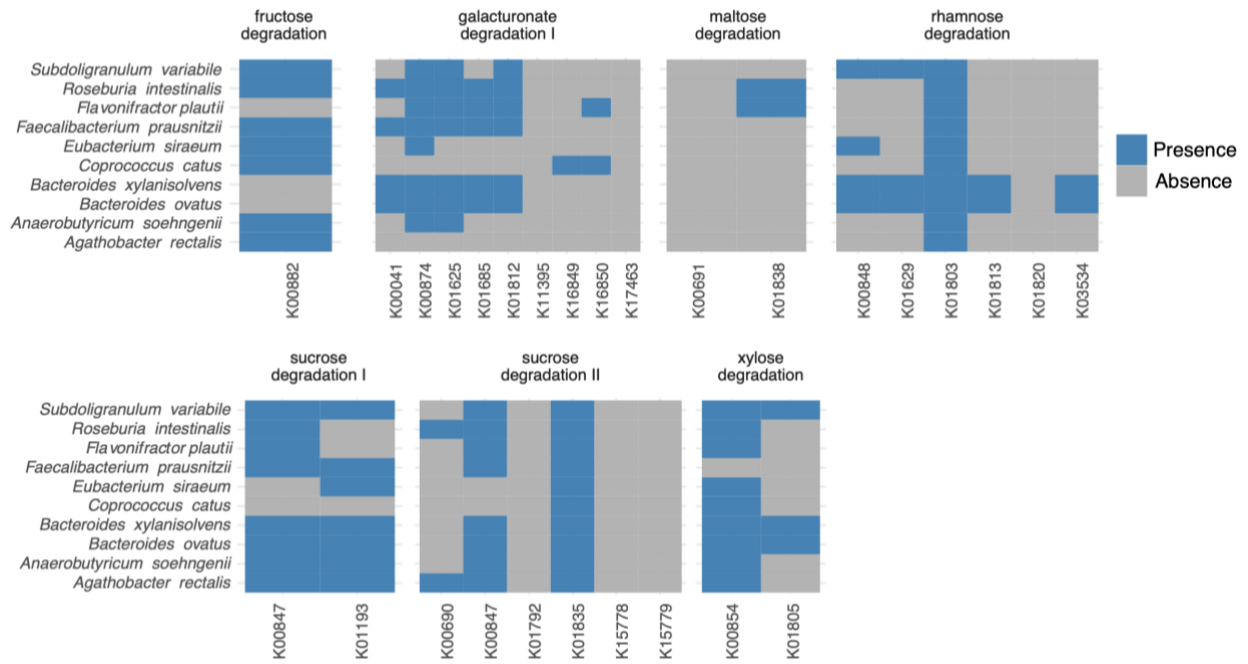

**Supplementary Figure S2: Genomic potential of Db-MM species for degradation of monosaccharides, sucrose and galacturonate.** Presence of specific KEGG orthologs defined by gut metabolic modules was investigated in genomes of strains used in Db-MM.



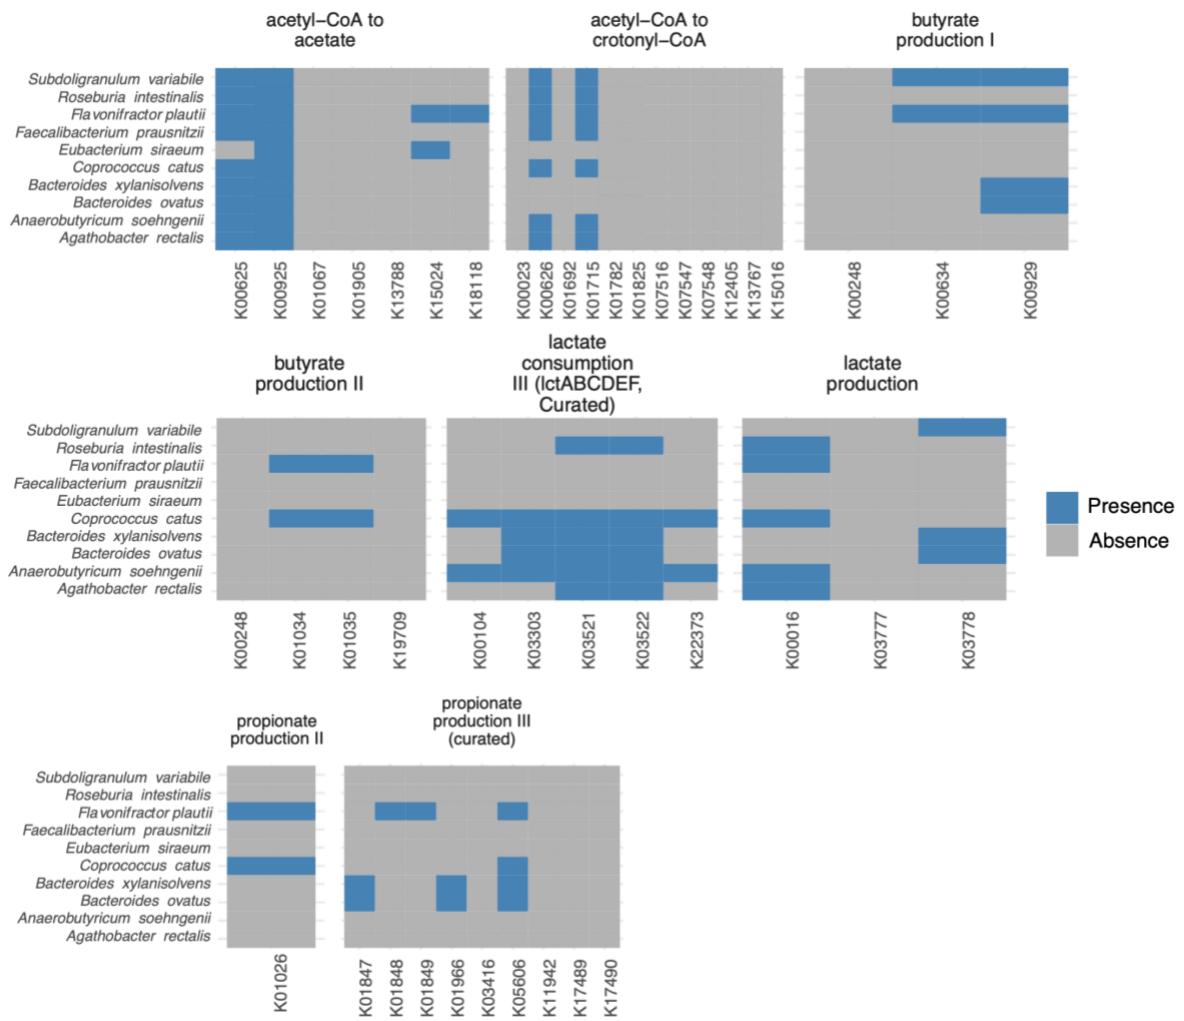

**Supplementary Figure S3: Genomic potential of Db-MM species for fermentative metabolism.** Presence of specific KEGG orthologs defined by gut metabolic modules was investigated in genomes of strains used in Db-MM.

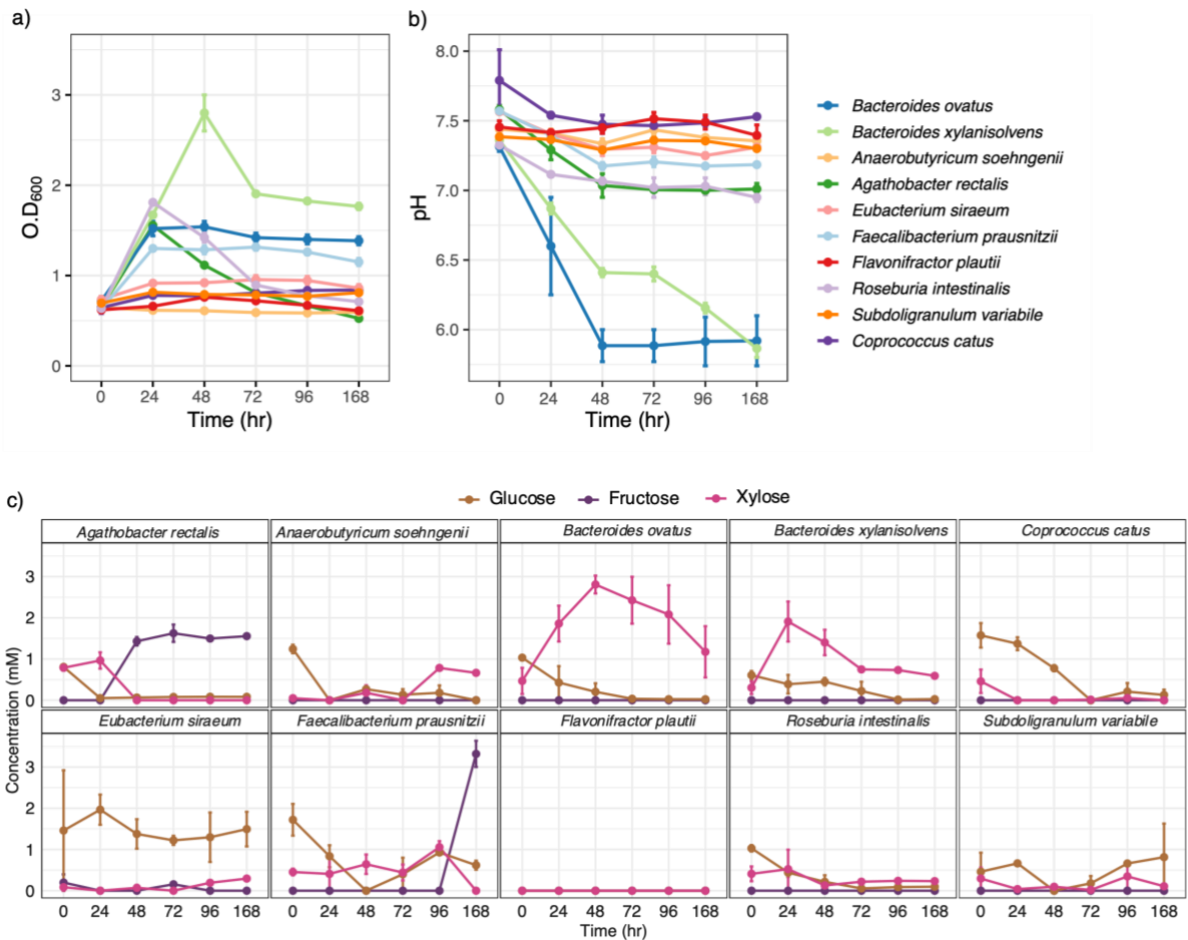

**Supplementary Figure S4: Mono-culture observations for Db-MM species.** a) Growth of Db-MM species in mono-culture measures as O.D<sub>600</sub> in presence of mixture of pectin, xylan, starch, inulin and cellobiose. B) Changes in pH for each Db-MM species when grown in mono-culture. c) Consumptions of mono-saccharides. Here, we detected minor amounts as these are affected by how the poly- and/or oligo- saccharides are degraded and consumed by each of the species.

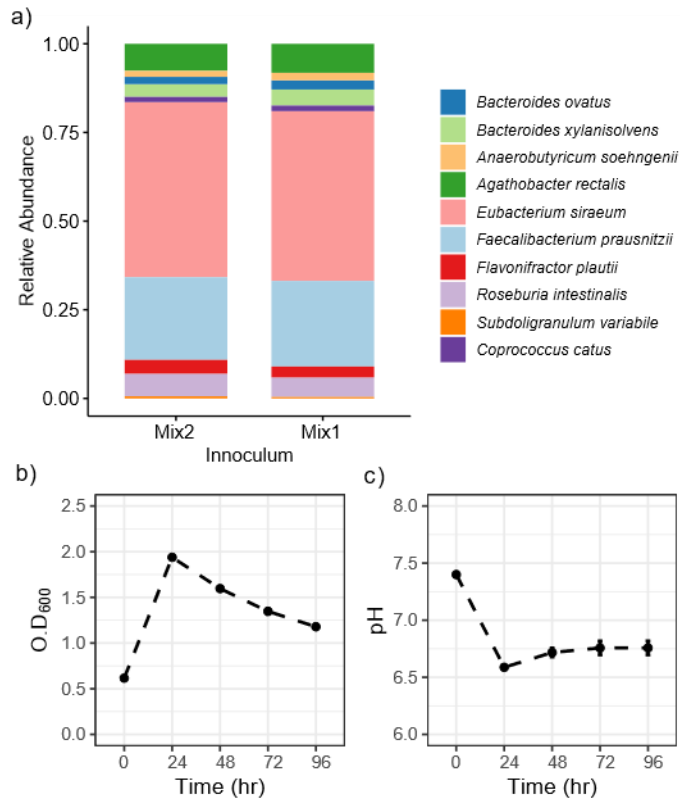

**Supplementary Figure S5: Inoculum and growth of Db-MM.** a) Composition of the inoculum used for assembling the Db-MM. Composition was measured using 16S rRNA gene sequencing and copy number corrected abundances are visualized as barplot. b) Optical density (O.D.<sub>600</sub>) of Db-MM. c) pH changes during growth of Db-MM.

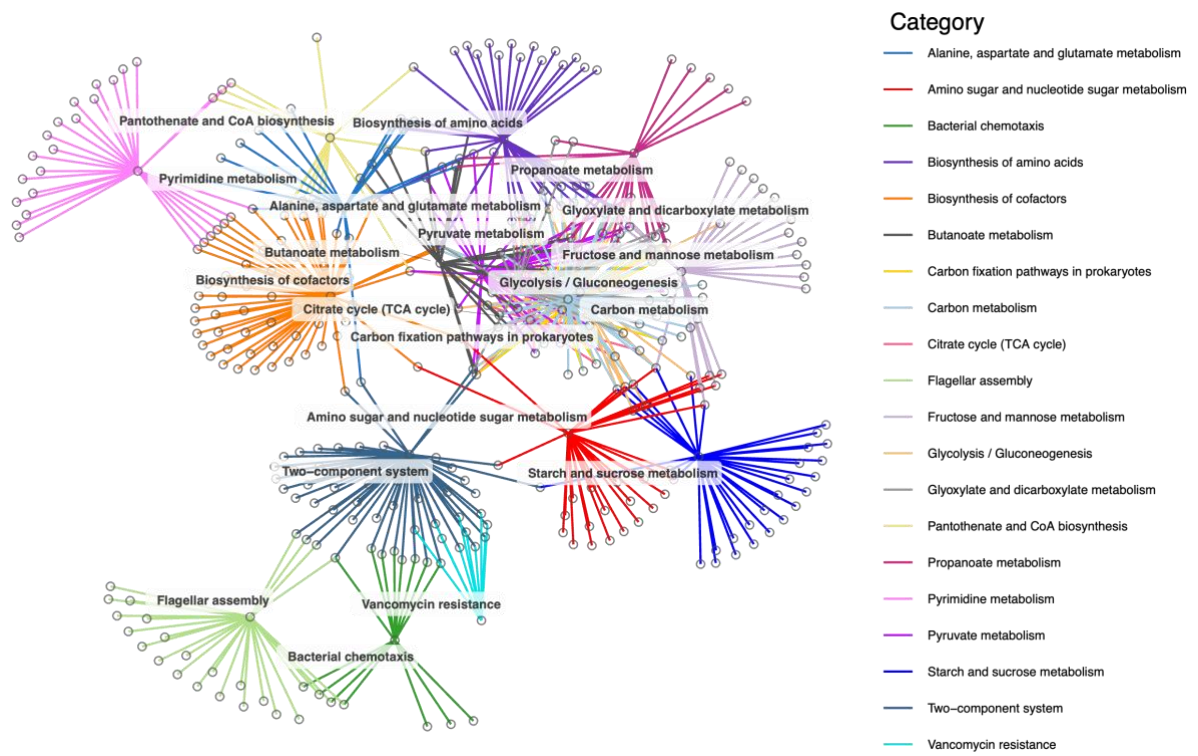

**Supplementary Figure S6: Metabolic interaction network in Db-MM.** Gene-Concept Network depicting functional modules with overlapping gene sets connected via edges. The fold change for KEGG KO was calculated using DESeq2 R package were used to identify enriched gene (KO) sets and pathway categories<sup>15,16</sup>.

a)

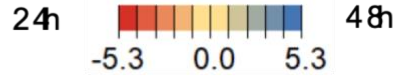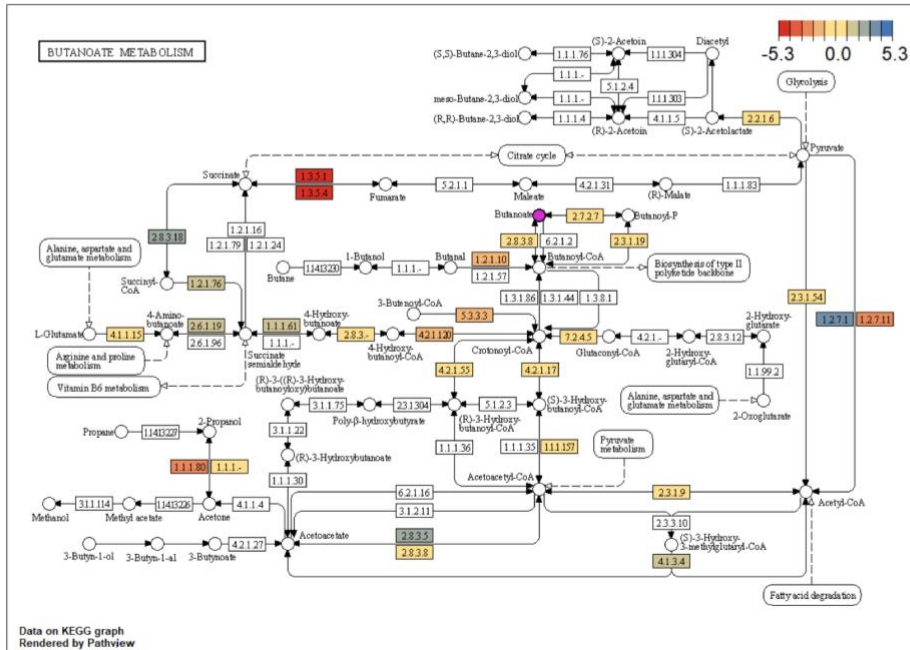

b)

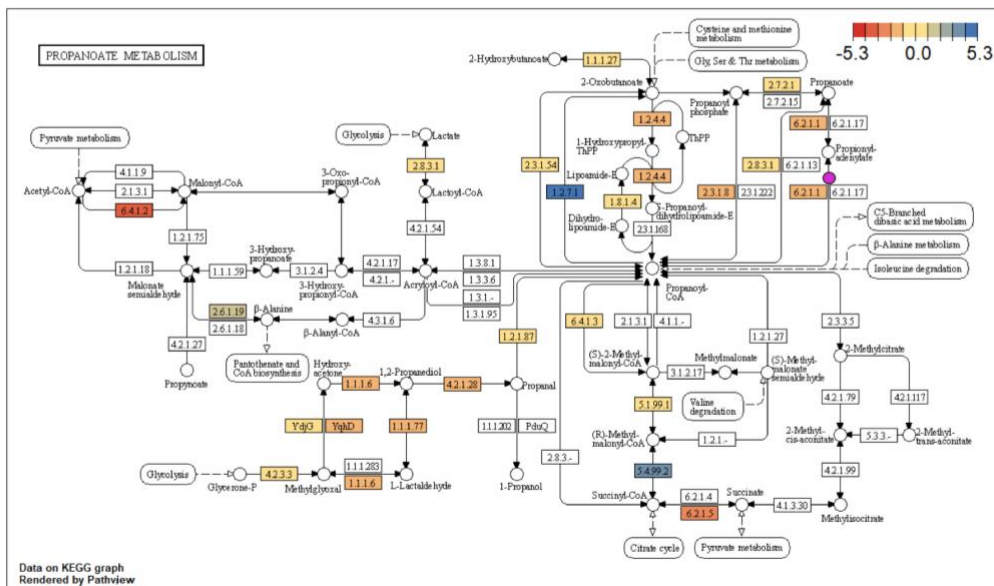

**Supplementary Figure S7: Reconstructed metabolic pathways in the Db-MM.** a) Butanoate (butyrate; purple filled circle) metabolism b) Propanoate (propionate; purple filled circle) metabolism. The reconstructed active gut metabolic modules in metatranscriptomics data were mapped on KEGG overviews of metabolic pathways using pathway. Red colour indicates higher expression at 24 h (n=3) and blue indicates higher expression at 48 h (n=3).



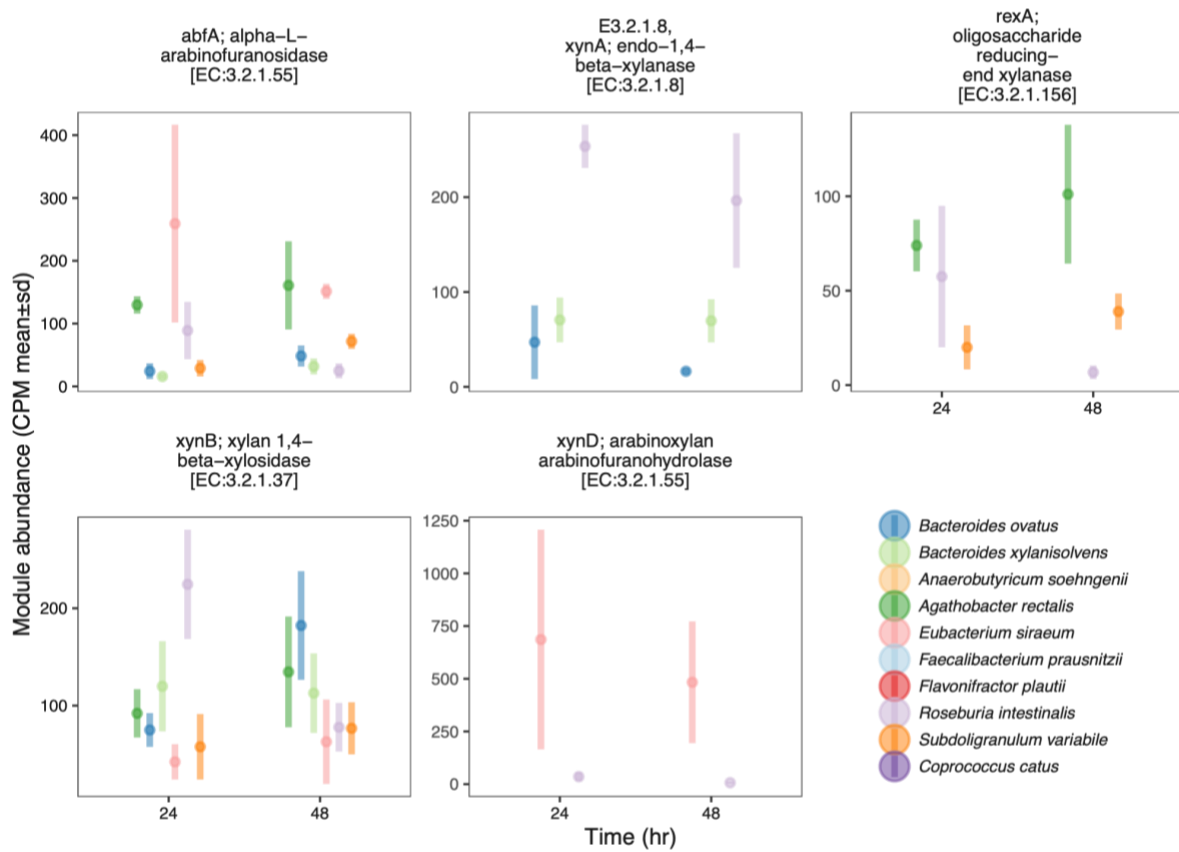

**Supplementary Figure S9: Abundances of KEGG KOs part of arabinoxylan degradation module.** The points represent the mean values and bars represent standard deviation values for each of the replicate.

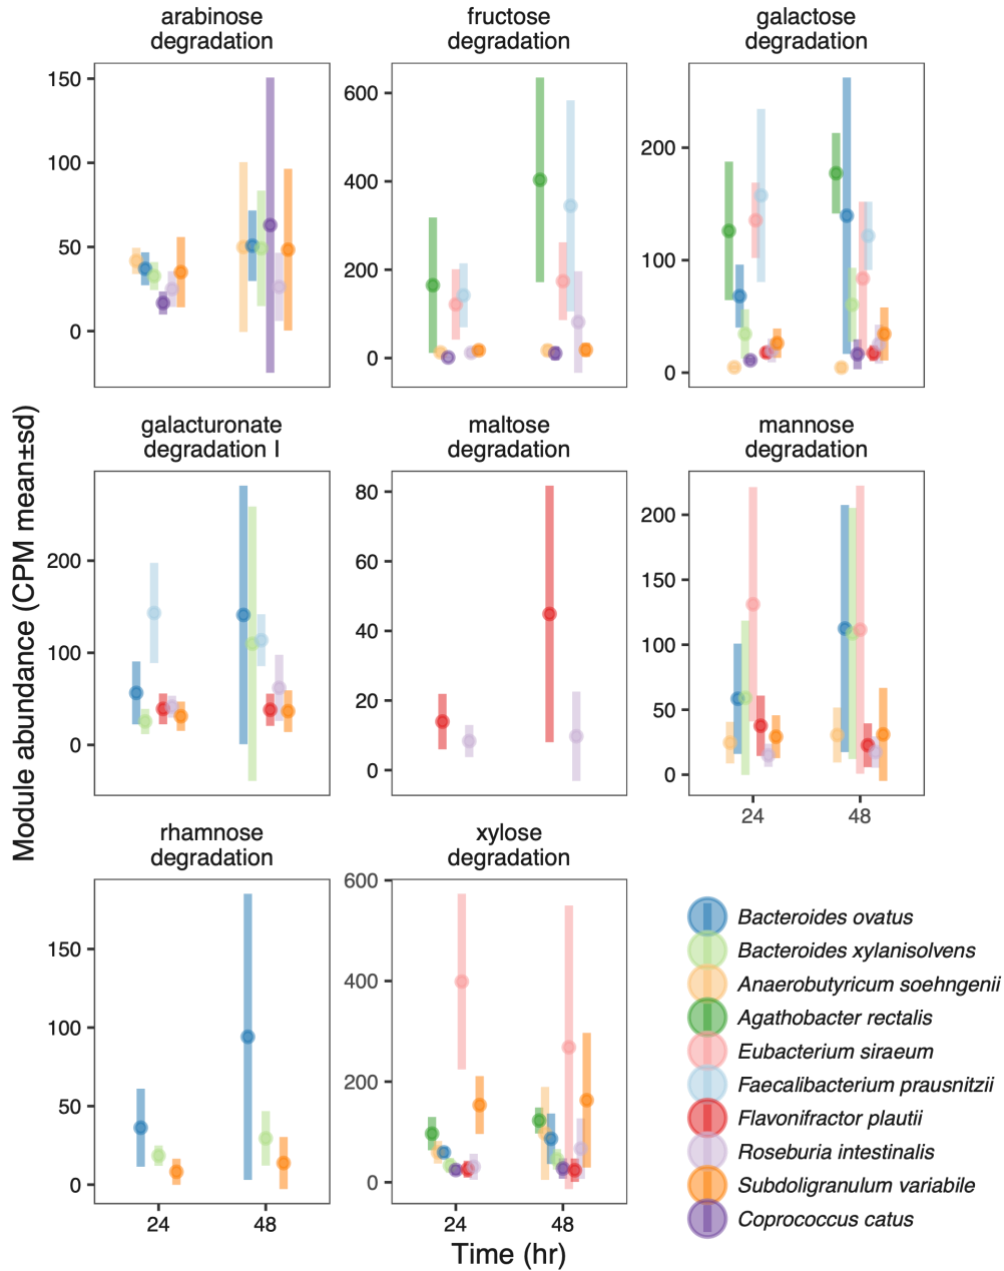

**Supplementary Figure S10: Species specific abundances of metabolic modules for mono-, di-saccharides and galacturonate.** The points represent the mean values and bars represent standard deviation values for each of the replicates.



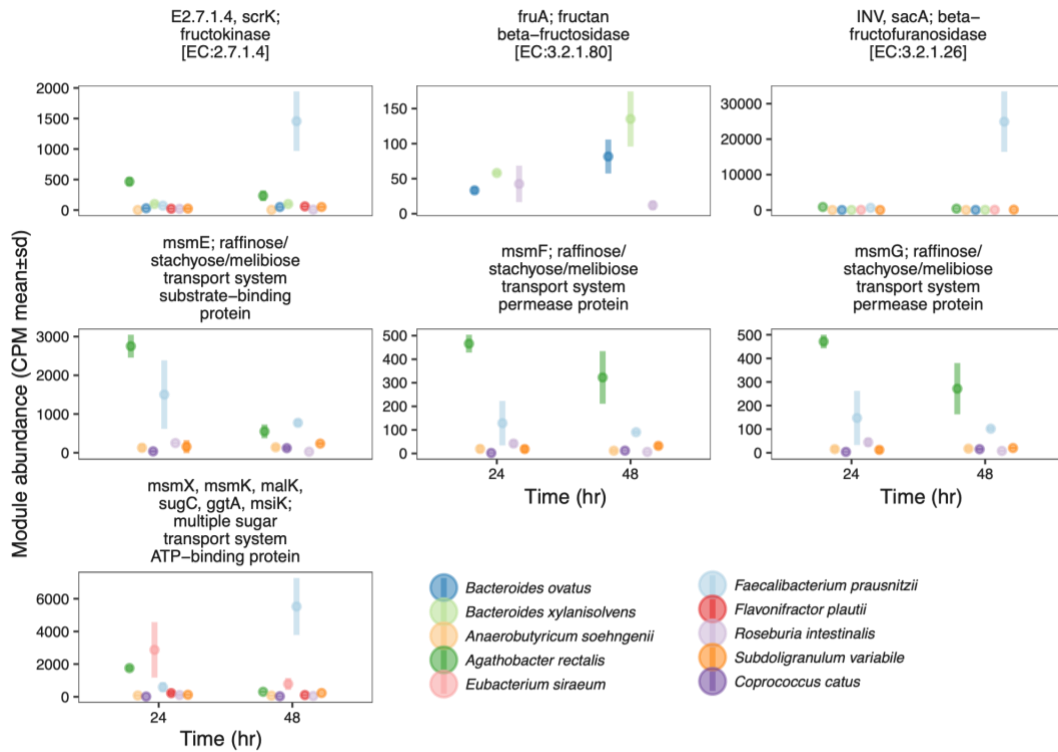

**Supplementary Figure S11: Abundances of KEGG KOs part of fructan degradation module.** The points represent the mean values and bars represent standard deviation values for each of the replicate.

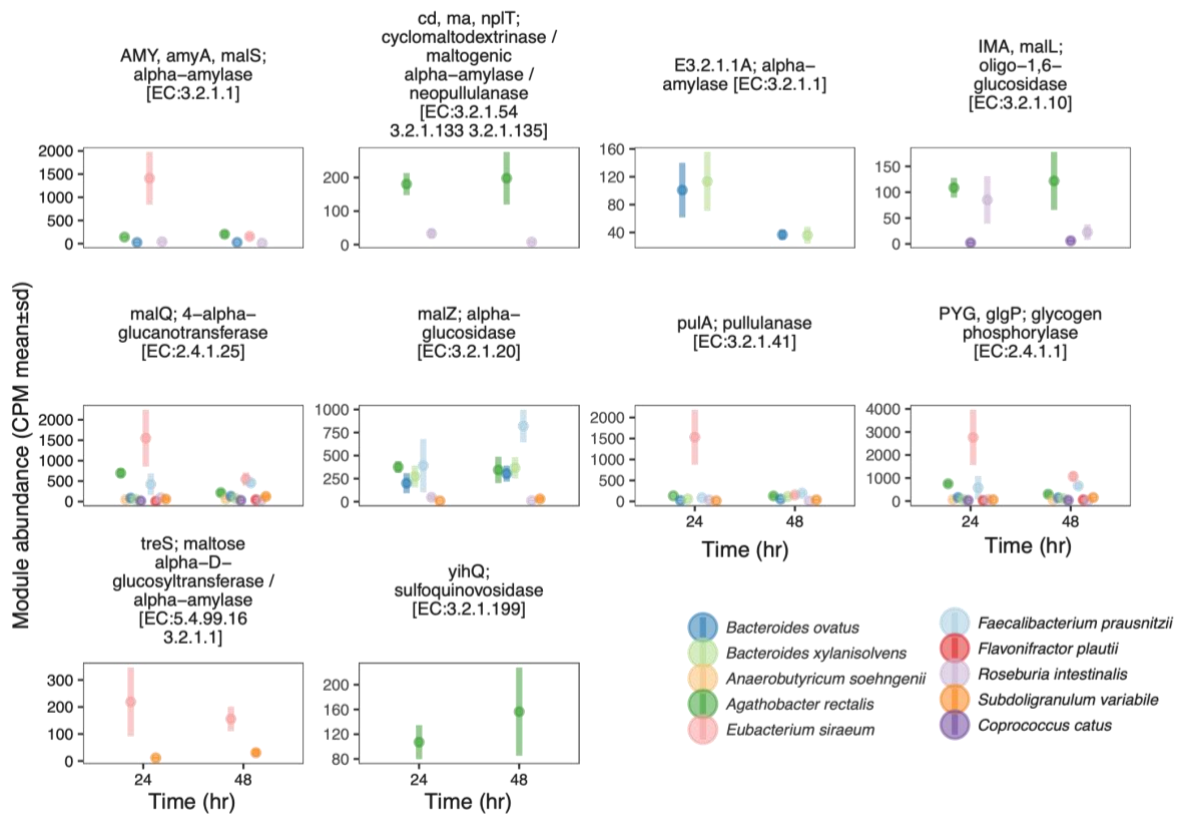

**Supplementary Figure S12: Abundances of KEGG KOs part of starch degradation module.** The points represent the mean values and bars represent standard deviation values for each of the replicate.

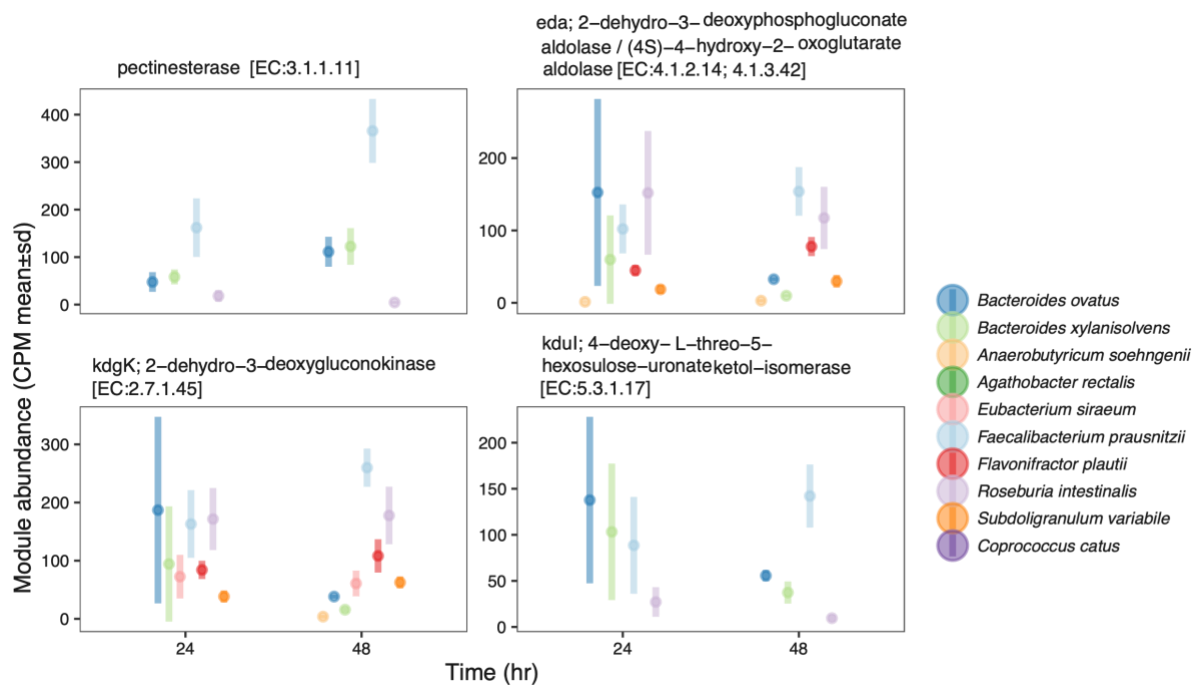

**Supplementary Figure S13: Abundances of KEGG KOs part of pectin degradation module.** The points represent the mean values and bars represent standard deviation values for each of the replicate.

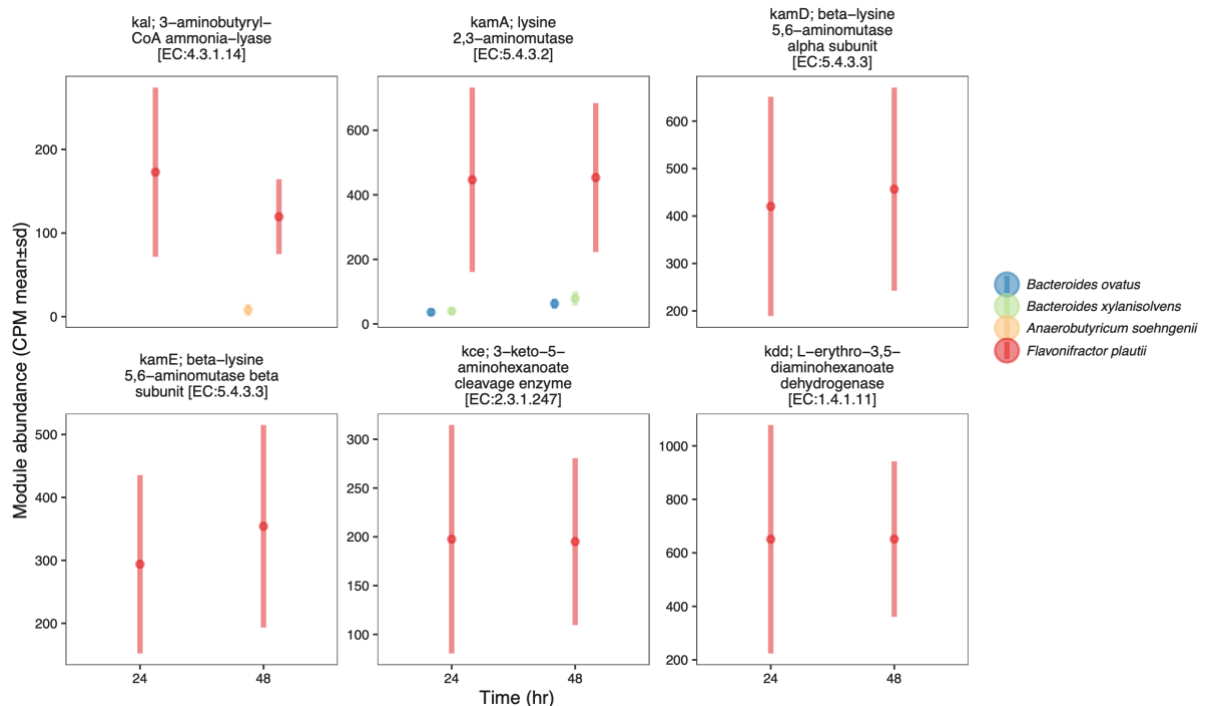

**Supplementary Figure S14: Abundances of KEGG KOs in lysine degradation GMM.** The points represent the mean values and bars represent standard deviation values for each of the replicate.

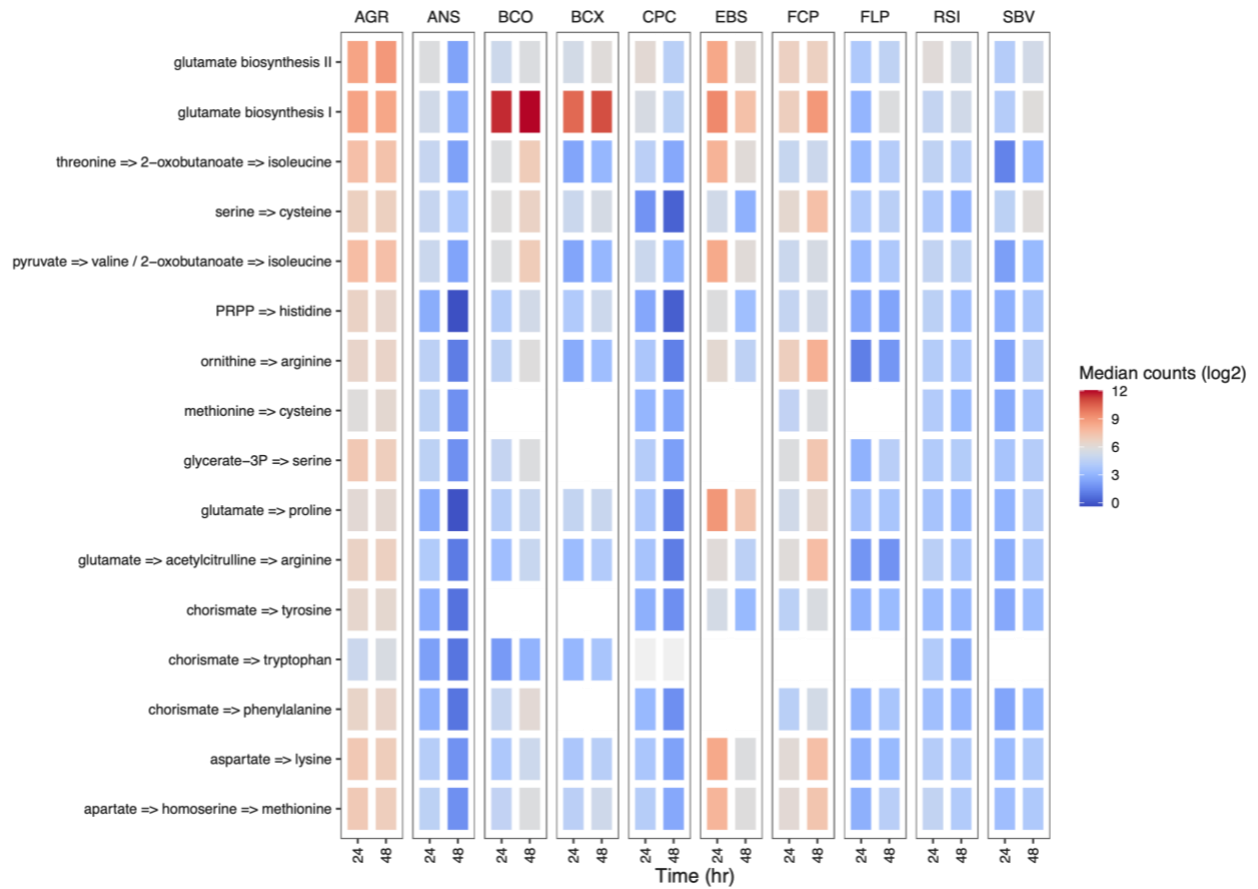

**Supplementary Figure S15: Amino acid biosynthesis modules.** The abundance values are counts per million log2 transformed for visualization. Abbreviations for taxon are: AGR, *A. rectalis*; ANS, *A. soehngeni*; BCO, *B. ovatus*; BCX, *B. xylanisolvens*; CPC, *C. catus*; EBS, *E. siraeum*; FCP, *F. prausnitzii*; FLP, *F. plautii*; RSI, *R. intestinalis*; SBV, *S. variabile*.

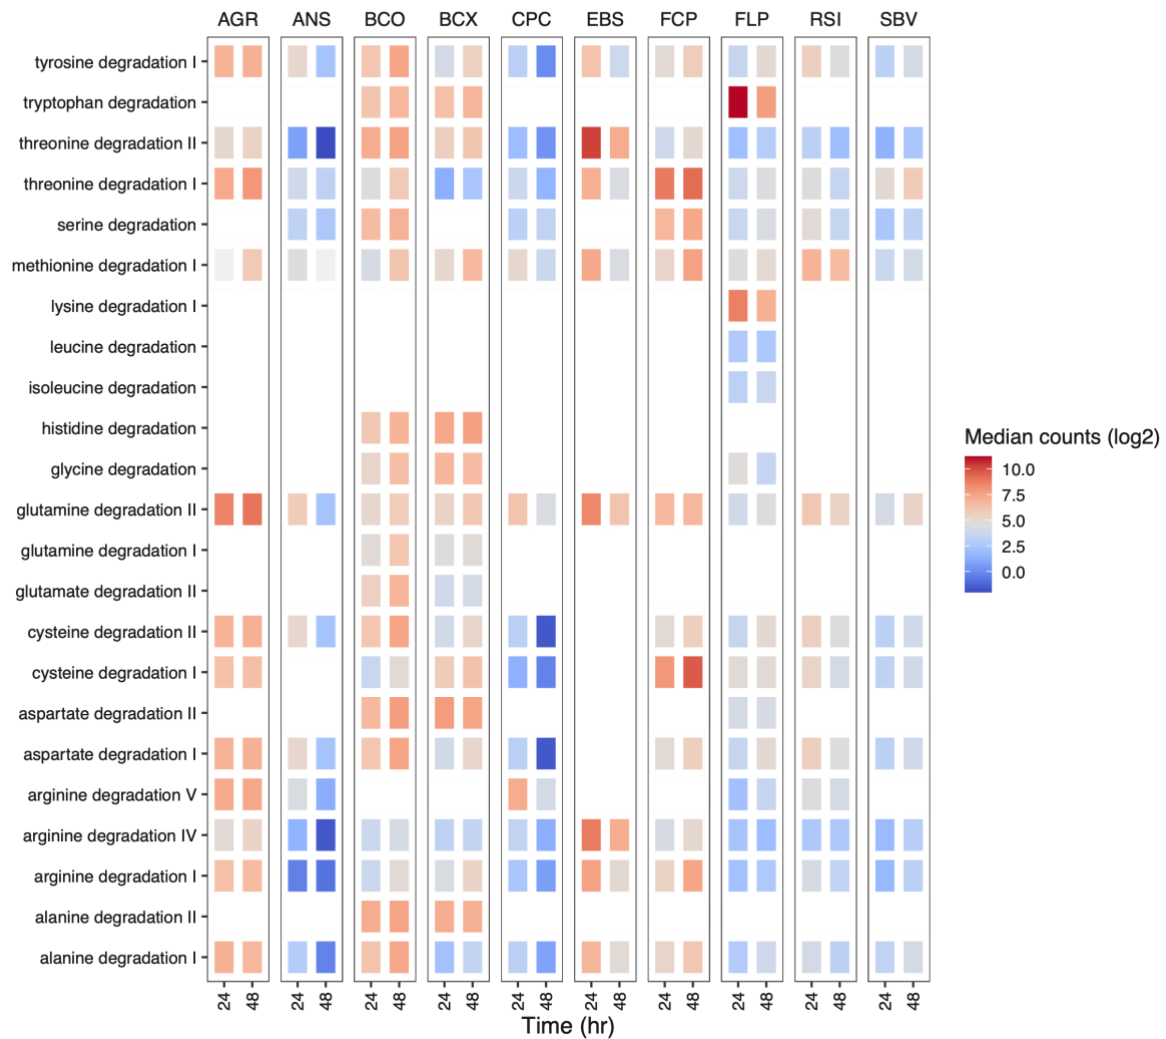

**Supplementary Figure S16: Amino acid degradation modules.** The abundance values are counts per million log<sub>2</sub> transformed for visualization. Abbreviations for taxon are: AGR, *A. rectalis*; ANS, *A. soehngenii*; BCO, *B. ovatus*; BCX, *B. xylanisolvens*; CPC, *C. catus*; EBS, *E. siraeum*; FCP, *F. prausnitzii*; FLP, *F. plautii*; RSI, *R. intestinalis*; SBV, *S. variabile*.

## Supplementary references

- 1 Cockburn, D. W. *et al.* Molecular details of a starch utilization pathway in the human gut symbiont *Eubacterium rectale*. *Molecular microbiology* **95**, 209-230 (2015).
- 2 Duncan, S. H. & Flint, H. J. Proposal of a neotype strain (A1-86) for *Eubacterium rectale*. Request for an opinion. *International journal of systematic and evolutionary microbiology* **58**, 1735-1736 (2008).
- 3 Sheridan, P. *et al.* Polysaccharide utilization loci and nutritional specialization in a dominant group of butyrate-producing human colonic Firmicutes. *Microbial Genomics* **2**, doi:doi:10.1099/mgen.0.000043 (2016).
- 4 Chassard, C., Delmas, E., Lawson, P. A. & Bernalier-Donadille, A. *Bacteroides xylanisolvens* sp. nov., a xylan-degrading bacterium isolated from human faeces. *International journal of systematic and evolutionary microbiology* **58**, 1008-1013 (2008).
- 5 Reichardt, N. *et al.* Phylogenetic distribution of three pathways for propionate production within the human gut microbiota. *The ISME journal* **8**, 1323 (2014).
- 6 Holdeman, L. V. & Moore, W. New genus, *Coprococcus*, twelve new species, and emended descriptions of four previously described species of bacteria from human feces. *International Journal of Systematic and Evolutionary Microbiology* **24**, 260-277 (1974).
- 7 Engels, C., Ruscheweyh, H.-J., Beerenwinkel, N., Lacroix, C. & Schwab, C. The common gut microbe *Eubacterium hallii* also contributes to intestinal propionate formation. *Frontiers in microbiology* **7**, 713 (2016).

- 8 Duncan, S. H. *et al.* Wheat bran promotes enrichment within the human colonic microbiota of butyrate-producing bacteria that release ferulic acid. *Environmental microbiology* **18**, 2214-2225 (2016).
- 9 MOORE, W. C., Johnson, J. & Holdeman, L. Emendation of Bacteroidaceae and Butyrivibrio and descriptions of Desulfomonas gen. nov. and ten new species in the genera Desulfomonas, Butyrivibrio, Eubacterium, Clostridium, and Ruminococcus. *International journal of systematic and evolutionary microbiology* **26**, 238-252 (1976).
- 10 Chung, W. S. F. *et al.* Prebiotic potential of pectin and pectic oligosaccharides to promote anti-inflammatory commensal bacteria in the human colon. *FEMS microbiology ecology* **93**, fix127 (2017).
- 11 Duncan, S. H., Hold, G. L., Harmsen, H. J., Stewart, C. S. & Flint, H. J. Growth requirements and fermentation products of *Fusobacterium prausnitzii*, and a proposal to reclassify it as *Faecalibacterium prausnitzii* gen. nov., comb. nov. *International journal of systematic and evolutionary microbiology* **52**, 2141-2146 (2002).
- 12 Duncan, S. H., Hold, G. L., Barcenilla, A., Stewart, C. S. & Flint, H. J. *Roseburia intestinalis* sp. nov., a novel saccharolytic, butyrate-producing bacterium from human faeces. *International journal of systematic and evolutionary microbiology* **52**, 1615-1620 (2002).
- 13 Holmstrøm, K., Collins, M. D., Møller, T., Falsen, E. & Lawson, P. A. *Subdoligranulum variabile* gen. nov., sp. nov. from human feces. *Anaerobe* **10**, 197-203 (2004).
- 14 Yoon, S.-H., Ha, S.-M., Lim, J., Kwon, S. & Chun, J. A large-scale evaluation of algorithms to calculate average nucleotide identity. *Antonie Van Leeuwenhoek* **110**, 1281-1286 (2017).
- 15 Chun, J. *et al.* EzTaxon: a web-based tool for the identification of prokaryotes based on 16S ribosomal RNA gene sequences. *International journal of systematic and evolutionary microbiology* **57**, 2259-2261 (2007).
- 16 Love, M. I., Huber, W. & Anders, S. Moderated estimation of fold change and dispersion for RNA-seq data with DESeq2. *Genome biology* **15**, 550 (2014).
- 17 Kimura, M. A simple method for estimating evolutionary rates of base substitutions through comparative studies of nucleotide sequences. *Journal of molecular evolution* **16**, 111-120 (1980).
- 18 Tamura, K., Stecher, G. & Kumar, S. MEGA11: molecular evolutionary genetics analysis version 11. *Molecular Biology and Evolution* **38**, 3022-3027 (2021).
